# Supplementary material for: Exploring Mitogenomes Diversity of Fusarium musae from Banana Fruits and Human Patients
Source: MDPI journal article supplement (doi:10.3390/microorganisms10061115), 2022-05-28
Supplement: s1 [file s1]

[illegible][illegible]

23

[illegible][illegible]

Sequence logo visualization of a 12-nucleotide motif. The y-axis represents information content in bits (0 to 1.5). The x-axis shows the 12 positions of the motif. The sequence is TGGTAATCAATATGTAGGTAGTGC CAAAGATTTTTATCTTAGACTTAATGAAAGAGCTCGCGCCCTTAAATAATAAAAAAATCTAATAGAAGTTTACAATA. The first 12 nucleotides (TGGTAATCAATATGTAGGTAGTGC) are highlighted with a red background. The 13th nucleotide (C) is highlighted with a blue background. The 14th nucleotide (A) is highlighted with a green background. The remaining 18 nucleotides (AGAGCTCGCGCCCTTAAATAATAAAAAAATCTAATAGAAGTTTACAATA) are highlighted with a light blue background.

[illegible][illegible][illegible]

\_\_\_\_\_
